# Supplementary material
Source: publisher figshare collection journal article supplement (https://frontiersin.figshare.com/ndownloader/files/24088730)
Supplement: Supplementary file 1 [file 24088730]

Supplementary Material

Table S – Volatile organic compounds (VOCs) content in the produced biogas.

| **Family of contaminants** | **CAS** | **Concentration (μg/m3)** |
| --- | --- | --- |
| ALCOHOLS |  | 160 |
| 2-methyl-2-propanol | [75-65-0](http://www.sigmaaldrich.com/catalog/search?term=25144-04-1&interface=CAS%20No.&N=0&mode=partialmax&lang=en&region=CZ&focus=product) | 88 |
| 2,2-dimethyl-1-propanol | 75-84-3 | 13 |
| diethoxymethane | 462-95-3 | 54 |
| 3,4-dimethyl-2-hexanol | 19550-05-1 | 5 |
| ALDEHYDES |  | 11 |
| pentanal | [110-63-3](http://www.commonchemistry.org/ChemicalDetail.aspx?ref=590-86-3) | 11 |
| KETONES |  | 552 |
| acetona | 67-64-1 | 286 |
| 2,3-butanedione | 431-03-8 | 239 |
| 2-butanone | 78-93-3 | 27 |
| CHLORINATED |  | 23 |
| tetrachloroethylene | 127-18-4 | 23 |
| ESTERS |  | 7 |
| acetic acid butyl ester | 123-86-4 | 7 |
| AROMATIC HIDROCARBONS |  | 51 |
| benzene | 71-43-2 | 4 |
| toluene | 108-88-3 | 21 |
| chlorobenzene | 108-90-7 | 11 |
| o-xylene | 95-47-6 | 3 |
| p-xylene | 106-42-3 | 12 |
| NO AROMATIC HIDROCARBONS |  | 515 |
| 2-butene | [106-98-9](http://www.commonchemistry.org/ChemicalDetail.aspx?ref=78-78-4) | 39 |
| 2-methyl-1-butene | [563-46-2](http://www.sigmaaldrich.com/catalog/search?term=110-54-3&interface=CAS%20No.&lang=en&region=US&focus=product) | 40 |
| pentane | 109-66-0 | 203 |
| 1,4-pentadiene | 591-93-5 | 5 |
| 1,2-dimethyl-cis-cyclopropane | 930-18-7 | 31 |
| 2-methyl-pentane | 107-83-5 | 34 |
| 2-methyl-1-pentene | 763-29-1 | 44 |
| n-hexane | 110-54-3 | 40 |
| 3-methylene-3-pentane | 760-21-4 | 16 |
| 3,3-dimethyl-1-butene | 558-37-2 | 4 |
| cyclohexane | 110-82-7 | 12 |
| 1,2-dimethyl-cis-cyclopentane | 1192-18-3 | 5 |
| heptane | 142-82-5 | 18 |
| 2,4,4-trimethyl-1-pentene | 107-39-1 | 4 |
| methyl-cyclohexane | 107-87-2 | 11 |
| 2,3,3-trimethyl-pentane | 560-21-4 | 3 |
| 4-methyl-heptane | 589-53-7 | 6 |
| SILICON COMPOUNDS* |  | 208 |
| oxalic acid, 2TMS derivate | 18294-04-7 | 4 |
| hexamethyl-cyclotrisiloxane | 541-05-9 | 197 |
| octamethyl-cyclotetrasiloxane | 556-67-2 | 7 |
| SULPHUR COMPOUNDS** |  | 175,136 |
| Sulfur dioxide | [7446-09-5](http://www.commonchemistry.org/ChemicalDetail.aspx?ref=74-93-1) | 117,933 |
| carbon disulfide | 75-15-0 | 57,203 |
| FURANS |  | 17 |
| tetrahydrofuran | 109-99-9 | 17 |
| DIOXINS |  | 7 |
| 2,3-dihydro-1,4-dioxin | 543,75-9 | 7 |
| * Threshold limit identified in UNE-EN 16723 is 300 μg-Si/m3  ** Threshold limit identified in UNE-EN 16723 is 20 000 μg-S/m3 | | |
